# Supplementary material
Source: publisher figshare collection journal article supplement (https://acs.figshare.com/ndownloader/files/4683085)
Supplement: Supplementary file 1 [file 4683085]

 
data_kb530e2m 
 
_audit_creation_method            SHELXL-97 
_chemical_name_systematic 
; 
 ? 
; 
_chemical_name_common             ? 
_chemical_melting_point           ? 
_chemical_formula_moiety          ? 
_chemical_formula_sum 
 'C15 H18 Cd N6 O11' 
_chemical_formula_weight          570.75 
 
loop_ 
 _atom_type_symbol 
 _atom_type_description 
 _atom_type_scat_dispersion_real 
 _atom_type_scat_dispersion_imag 
 _atom_type_scat_source 
 'C'  'C'   0.0033   0.0016 
 'International Tables Vol C Tables 4.2.6.8 and 6.1.1.4' 
 'H'  'H'   0.0000   0.0000 
 'International Tables Vol C Tables 4.2.6.8 and 6.1.1.4' 
 'N'  'N'   0.0061   0.0033 
 'International Tables Vol C Tables 4.2.6.8 and 6.1.1.4' 
 'O'  'O'   0.0106   0.0060 
 'International Tables Vol C Tables 4.2.6.8 and 6.1.1.4' 
 'Cd'  'Cd'  -0.8075   1.2024 
 'International Tables Vol C Tables 4.2.6.8 and 6.1.1.4' 
 
_symmetry_cell_setting            'MONOCLINIC' 
_symmetry_space_group_name_H-M    'P2(1)/n' 
 
loop_ 
 _symmetry_equiv_pos_as_xyz 
 'x, y, z' 
 '-x+1/2, y+1/2, -z+1/2' 
 '-x, -y, -z' 
 'x-1/2, -y-1/2, z-1/2' 
 
_cell_length_a                    7.5913(5) 
_cell_length_b                    17.5116(12) 
_cell_length_c                    16.5963(12) 
_cell_angle_alpha                 90.00 
_cell_angle_beta                  99.3780(10) 
_cell_angle_gamma                 90.00 
_cell_volume                      2176.8(3) 
_cell_formula_units_Z             4 
_cell_measurement_temperature     100(2) 
_cell_measurement_reflns_used     ? 
_cell_measurement_theta_min       ? 
_cell_measurement_theta_max       ? 
 
_exptl_crystal_description        NEEDLE 
_exptl_crystal_colour             COLORLESS
_exptl_crystal_size_max           0.46 
_exptl_crystal_size_mid           0.12 
_exptl_crystal_size_min           0.03 
_exptl_crystal_density_meas       ? 
_exptl_crystal_density_diffrn     1.742 
_exptl_crystal_density_method     'not measured' 
_exptl_crystal_F_000              1144 
_exptl_absorpt_coefficient_mu     1.073 
_exptl_absorpt_correction_type    'MULTI-SCAN' 
_exptl_absorpt_correction_T_min   0.6381 
_exptl_absorpt_correction_T_max   0.9685 
_exptl_absorpt_process_details    'SADABS'
 
_exptl_special_details 
; 
 ? 
; 
 
_diffrn_ambient_temperature       100(2) 
_diffrn_radiation_wavelength      0.71073 
_diffrn_radiation_type            MoK\a 
_diffrn_radiation_source          'fine-focus sealed tube' 
_diffrn_radiation_monochromator   graphite 
_diffrn_measurement_device_type   'BRUKER CCD AREA DETECTOR' 
_diffrn_measurement_method        'PHI-OMEGA'  
_diffrn_detector_area_resol_mean  0.3 
_diffrn_standards_number          ? 
_diffrn_standards_interval_count  ? 
_diffrn_standards_interval_time   ? 
_diffrn_standards_decay_%         ? 
_diffrn_reflns_number             21108 
_diffrn_reflns_av_R_equivalents   0.0428 
_diffrn_reflns_av_sigmaI/netI     0.0301 
_diffrn_reflns_limit_h_min        -9 
_diffrn_reflns_limit_h_max        9 
_diffrn_reflns_limit_k_min        -21 
_diffrn_reflns_limit_k_max        21 
_diffrn_reflns_limit_l_min        -20 
_diffrn_reflns_limit_l_max        20 
_diffrn_reflns_theta_min          1.70 
_diffrn_reflns_theta_max          25.50 
_reflns_number_total              4057 
_reflns_number_gt                 3845 
_reflns_threshold_expression      >2sigma(I) 
 
_computing_data_collection        'BRUKER AXS SMART 3'  
_computing_cell_refinement        'BRUKER AXS SMART 3'  
_computing_data_reduction         'BRUKER AXS SAINT'
_computing_structure_solution     'SHELXS-97 (Sheldrick, 1990)' 
_computing_structure_refinement   'SHELXL-97 (Sheldrick, 1997)' 
_computing_molecular_graphics     'BRUKER SHELXLTL'
_computing_publication_material   'MERCURY 1.4.1'
 
_refine_special_details 
; 
 Refinement of F^2^ against ALL reflections.  The weighted R-factor wR and 
 goodness of fit S are based on F^2^, conventional R-factors R are based 
 on F, with F set to zero for negative F^2^. The threshold expression of 
 F^2^ > 2sigma(F^2^) is used only for calculating R-factors(gt) etc. and is 
 not relevant to the choice of reflections for refinement.  R-factors based 
 on F^2^ are statistically about twice as large as those based on F, and R- 
 factors based on ALL data will be even larger. 
; 
 
_refine_ls_structure_factor_coef  Fsqd  
_refine_ls_matrix_type            full 
_refine_ls_weighting_scheme       calc  
_refine_ls_weighting_details 
 'calc w=1/[\s^2^(Fo^2^)+(0.0392P)^2^+6.7721P] where P=(Fo^2^+2Fc^2^)/3' 
_atom_sites_solution_primary      direct 
_atom_sites_solution_secondary    difmap 
_atom_sites_solution_hydrogens    geom 
_refine_ls_hydrogen_treatment     mixed 
_refine_ls_extinction_method      none 
_refine_ls_extinction_coef        ? 
_refine_ls_number_reflns          4057 
_refine_ls_number_parameters      339 
_refine_ls_number_restraints      8 
_refine_ls_R_factor_all           0.0472 
_refine_ls_R_factor_gt            0.0437 
_refine_ls_wR_factor_ref          0.0995 
_refine_ls_wR_factor_gt           0.0976 
_refine_ls_goodness_of_fit_ref    1.181 
_refine_ls_restrained_S_all       1.181 
_refine_ls_shift/su_max           0.004 
_refine_ls_shift/su_mean          0.000 
 
loop_ 
 _atom_site_label 
 _atom_site_type_symbol 
 _atom_site_fract_x 
 _atom_site_fract_y 
 _atom_site_fract_z 
 _atom_site_U_iso_or_equiv 
 _atom_site_adp_type 
 _atom_site_occupancy 
 _atom_site_symmetry_multiplicity 
 _atom_site_calc_flag 
 _atom_site_refinement_flags 
 _atom_site_disorder_assembly 
 _atom_site_disorder_group 
Cd1 Cd 0.86108(4) 0.221159(15) 0.248555(17) 0.01315(11) Uani 1 1 d . . . 
N1 N 0.8532(4) 0.20214(19) 0.3844(2) 0.0153(7) Uani 1 1 d . . . 
C2 C 0.8101(5) 0.1330(2) 0.4098(2) 0.0153(8) Uani 1 1 d . . . 
H2 H 0.7906 0.0926 0.3711 0.018 Uiso 1 1 calc R . . 
C3 C 0.7930(5) 0.1179(2) 0.4898(2) 0.0142(8) Uani 1 1 d . . . 
C4 C 0.8170(6) 0.1776(2) 0.5457(3) 0.0173(9) Uani 1 1 d . . . 
H4 H 0.8041 0.1694 0.6011 0.021 Uiso 1 1 calc R . . 
C5 C 0.8600(6) 0.2490(2) 0.5194(3) 0.0201(9) Uani 1 1 d . . . 
H5 H 0.8763 0.2906 0.5565 0.024 Uiso 1 1 calc R . . 
C6 C 0.8791(6) 0.2597(2) 0.4388(3) 0.0195(9) Uani 1 1 d . . . 
H6 H 0.9113 0.3087 0.4214 0.023 Uiso 1 1 calc R . . 
N7 N 0.7434(4) 0.04587(18) 0.5165(2) 0.0139(7) Uani 1 1 d . . . 
H7 H 0.6939 0.0448 0.5609 0.017 Uiso 1 1 calc R . . 
C8 C 0.7653(5) -0.0227(2) 0.4796(2) 0.0133(8) Uani 1 1 d . . . 
O9 O 0.8317(4) -0.02976(15) 0.41750(17) 0.0172(6) Uani 1 1 d . . . 
N10 N 0.7065(4) -0.08247(18) 0.5212(2) 0.0146(7) Uani 1 1 d . . . 
H10 H 0.6793 -0.0726 0.5696 0.018 Uiso 1 1 calc R . . 
C11 C 0.6856(5) -0.1583(2) 0.4932(2) 0.0152(8) Uani 1 1 d . . . 
C12 C 0.6909(5) -0.1801(2) 0.4132(2) 0.0140(8) Uani 1 1 d . . . 
H12 H 0.7150 -0.1423 0.3753 0.017 Uiso 1 1 calc R . . 
N13 N 0.6633(5) -0.25270(19) 0.3872(2) 0.0165(7) Uani 1 1 d . . . 
C14 C 0.6317(6) -0.3064(2) 0.4411(3) 0.0228(9) Uani 1 1 d . . . 
H14 H 0.6129 -0.3577 0.4231 0.027 Uiso 1 1 calc R . . 
C15 C 0.6258(7) -0.2890(2) 0.5220(3) 0.0243(10) Uani 1 1 d . . . 
H15 H 0.6035 -0.3278 0.5590 0.029 Uiso 1 1 calc R . . 
C16 C 0.6528(6) -0.2139(2) 0.5485(3) 0.0201(9) Uani 1 1 d . . . 
H16 H 0.6490 -0.2009 0.6037 0.024 Uiso 1 1 calc R . . 
O17 O 0.6669(4) 0.32831(17) 0.25670(18) 0.0199(6) Uani 1 1 d . . . 
N18 N 0.5134(4) 0.30170(19) 0.2538(2) 0.0157(7) Uani 1 1 d . . . 
O19 O 0.3871(4) 0.34647(17) 0.25921(19) 0.0225(7) Uani 1 1 d . . . 
O20 O 0.4876(4) 0.23150(16) 0.2451(2) 0.0232(7) Uani 1 1 d . . . 
O21 O 0.7707(4) 0.09868(17) 0.21237(19) 0.0205(7) Uani 1 1 d D . . 
O22 O 1.1387(4) 0.15886(19) 0.2469(2) 0.0245(7) Uani 1 1 d D . . 
O23 O 1.0445(4) 0.32477(18) 0.28993(19) 0.0185(6) Uani 1 1 d D . . 
O24 O 0.5328(4) 0.98336(17) 0.24183(18) 0.0212(7) Uani 1 1 d . . . 
N25 N 0.4626(4) 0.99561(19) 0.3036(2) 0.0149(7) Uani 1 1 d . . . 
O26 O 0.4419(4) 1.06285(15) 0.32696(18) 0.0196(6) Uani 1 1 d . . . 
O27 O 0.4141(4) 0.94021(15) 0.34240(18) 0.0188(6) Uani 1 1 d . . . 
O28 O 0.0258(4) 1.00202(18) 0.2933(2) 0.0210(7) Uani 1 1 d D . . 
C29 C 0.6812(15) 0.9838(6) -0.0582(7) 0.038(2) Uani 0.50 1 d P . . 
C30 C 0.6944(14) 0.9622(6) 0.0253(7) 0.034(2) Uani 0.50 1 d P . . 
C31 C 0.8489(8) 0.9607(3) 0.0715(3) 0.0356(12) Uani 1 1 d . . . 
C32 C 1.0070(7) 0.9885(2) 0.0417(3) 0.0272(10) Uani 1 1 d . . . 
C33 C 1.1780(8) 0.9920(3) 0.0944(4) 0.0399(13) Uani 1 1 d . . . 
H21A H 0.677(6) 0.078(4) 0.219(4) 0.051(19) Uiso 1 1 d D . . 
H21B H 0.849(7) 0.068(4) 0.231(4) 0.07(2) Uiso 1 1 d D . . 
H23A H 1.151(4) 0.326(3) 0.279(3) 0.038(16) Uiso 1 1 d D . . 
H23B H 1.002(7) 0.363(3) 0.275(3) 0.030(15) Uiso 1 1 d . . . 
H22A H 1.157(7) 0.119(2) 0.269(3) 0.035(17) Uiso 1 1 d D . . 
H22B H 1.236(6) 0.176(3) 0.244(4) 0.039(17) Uiso 1 1 d D . . 
H28B H -0.020(7) 0.998(3) 0.334(3) 0.038(16) Uiso 1 1 d D . . 
H28A H 0.049(10) 0.967(3) 0.264(4) 0.08(3) Uiso 1 1 d D . . 
 
loop_ 
 _atom_site_aniso_label 
 _atom_site_aniso_U_11 
 _atom_site_aniso_U_22 
 _atom_site_aniso_U_33 
 _atom_site_aniso_U_23 
 _atom_site_aniso_U_13 
 _atom_site_aniso_U_12 
Cd1 0.01538(17) 0.00824(16) 0.01653(17) 0.00213(11) 0.00467(11) 0.00068(11) 
N1 0.0173(17) 0.0091(16) 0.0206(18) -0.0005(13) 0.0063(14) 0.0001(13) 
C2 0.017(2) 0.0089(19) 0.020(2) 0.0008(15) 0.0031(16) 0.0024(15) 
C3 0.0113(19) 0.0093(19) 0.022(2) 0.0017(16) 0.0035(16) 0.0010(15) 
C4 0.022(2) 0.012(2) 0.018(2) 0.0003(16) 0.0055(17) 0.0011(16) 
C5 0.031(2) 0.011(2) 0.019(2) -0.0046(17) 0.0071(18) 0.0003(17) 
C6 0.024(2) 0.0080(19) 0.028(2) 0.0008(17) 0.0086(18) -0.0013(16) 
N7 0.0221(18) 0.0074(16) 0.0140(16) 0.0007(13) 0.0083(14) 0.0003(13) 
C8 0.016(2) 0.0099(19) 0.014(2) -0.0008(15) -0.0002(16) 0.0011(15) 
O9 0.0236(16) 0.0111(14) 0.0184(15) -0.0007(11) 0.0085(12) -0.0016(11) 
N10 0.0232(18) 0.0074(16) 0.0144(17) -0.0017(13) 0.0068(14) -0.0005(13) 
C11 0.0136(19) 0.012(2) 0.020(2) -0.0012(16) 0.0023(16) 0.0007(15) 
C12 0.017(2) 0.0077(19) 0.017(2) -0.0007(15) 0.0023(16) 0.0001(15) 
N13 0.0190(18) 0.0106(16) 0.0195(18) -0.0002(14) 0.0022(14) -0.0005(13) 
C14 0.033(3) 0.010(2) 0.025(2) -0.0017(17) 0.0019(19) -0.0026(18) 
C15 0.039(3) 0.012(2) 0.023(2) 0.0022(17) 0.007(2) -0.0070(19) 
C16 0.030(2) 0.014(2) 0.016(2) -0.0012(16) 0.0043(17) -0.0040(18) 
O17 0.0118(14) 0.0179(15) 0.0308(17) 0.0025(12) 0.0057(12) -0.0002(11) 
N18 0.0153(18) 0.0141(17) 0.0173(18) 0.0048(14) 0.0017(14) 0.0016(14) 
O19 0.0174(15) 0.0153(15) 0.0364(18) -0.0001(13) 0.0098(13) 0.0033(12) 
O20 0.0182(15) 0.0131(15) 0.0391(19) -0.0002(13) 0.0068(13) -0.0053(12) 
O21 0.0259(18) 0.0098(15) 0.0271(17) 0.0011(12) 0.0078(14) -0.0044(13) 
O22 0.0232(18) 0.0156(17) 0.0346(19) 0.0025(14) 0.0047(14) 0.0069(14) 
O23 0.0170(16) 0.0112(16) 0.0276(17) 0.0034(12) 0.0049(13) -0.0004(12) 
O24 0.0273(17) 0.0189(16) 0.0199(15) -0.0029(12) 0.0112(13) -0.0048(13) 
N25 0.0144(17) 0.0113(17) 0.0186(18) -0.0005(13) 0.0015(14) 0.0001(13) 
O26 0.0243(16) 0.0082(14) 0.0267(16) -0.0023(12) 0.0054(13) 0.0008(12) 
O27 0.0244(16) 0.0098(14) 0.0242(16) 0.0025(12) 0.0099(12) -0.0006(12) 
O28 0.0251(17) 0.0163(16) 0.0232(17) 0.0012(13) 0.0091(14) 0.0030(13) 
C29 0.042(6) 0.027(5) 0.042(6) 0.003(5) -0.002(5) 0.001(5) 
C30 0.042(6) 0.021(5) 0.040(6) 0.004(4) 0.005(5) 0.001(4) 
C31 0.050(3) 0.022(3) 0.037(3) 0.002(2) 0.014(3) 0.005(2) 
C32 0.041(3) 0.007(2) 0.036(3) -0.0027(18) 0.011(2) 0.0066(18) 
C33 0.047(3) 0.026(3) 0.049(3) 0.004(2) 0.014(3) 0.001(2) 
 
_geom_special_details 
; 
 All esds (except the esd in the dihedral angle between two l.s. planes) 
 are estimated using the full covariance matrix.  The cell esds are taken 
 into account individually in the estimation of esds in distances, angles 
 and torsion angles; correlations between esds in cell parameters are only 
 used when they are defined by crystal symmetry.  An approximate (isotropic) 
 treatment of cell esds is used for estimating esds involving l.s. planes. 
; 
 
loop_ 
 _geom_bond_atom_site_label_1 
 _geom_bond_atom_site_label_2 
 _geom_bond_distance 
 _geom_bond_site_symmetry_2 
 _geom_bond_publ_flag 
Cd1 N13 2.276(3) 2_655 ? 
Cd1 N1 2.289(3) . ? 
Cd1 O21 2.302(3) . ? 
Cd1 O23 2.322(3) . ? 
Cd1 O22 2.377(3) . ? 
Cd1 O17 2.404(3) . ? 
N1 C2 1.340(5) . ? 
N1 C6 1.346(5) . ? 
C2 C3 1.380(6) . ? 
C2 H2 0.9500 . ? 
C3 C4 1.390(6) . ? 
C3 N7 1.409(5) . ? 
C4 C5 1.381(6) . ? 
C4 H4 0.9500 . ? 
C5 C6 1.382(6) . ? 
C5 H5 0.9500 . ? 
C6 H6 0.9500 . ? 
N7 C8 1.370(5) . ? 
N7 H7 0.8800 . ? 
C8 O9 1.225(5) . ? 
C8 N10 1.368(5) . ? 
N10 C11 1.407(5) . ? 
N10 H10 0.8800 . ? 
C11 C16 1.388(6) . ? 
C11 C12 1.390(6) . ? 
C12 N13 1.348(5) . ? 
C12 H12 0.9500 . ? 
N13 C14 1.346(6) . ? 
N13 Cd1 2.276(3) 2_645 ? 
C14 C15 1.385(6) . ? 
C14 H14 0.9500 . ? 
C15 C16 1.390(6) . ? 
C15 H15 0.9500 . ? 
C16 H16 0.9500 . ? 
O17 N18 1.248(4) . ? 
N18 O20 1.249(4) . ? 
N18 O19 1.253(4) . ? 
O21 H21A 0.82(4) . ? 
O21 H21B 0.82(4) . ? 
O22 H22A 0.78(3) . ? 
O22 H22B 0.80(4) . ? 
O23 H23A 0.86(3) . ? 
O23 H23B 0.77(6) . ? 
O24 N25 1.248(4) . ? 
N25 O27 1.253(4) . ? 
N25 O26 1.258(4) . ? 
O28 H28B 0.82(3) . ? 
O28 H28A 0.82(4) . ? 
C29 C33 1.377(13) 3_775 ? 
C29 C30 1.424(15) . ? 
C30 C31 1.293(12) . ? 
C31 C32 1.455(7) . ? 
C32 C32 1.429(10) 3_775 ? 
C32 C33 1.443(8) . ? 
C33 C29 1.377(13) 3_775 ? 
 
loop_ 
 _geom_angle_atom_site_label_1 
 _geom_angle_atom_site_label_2 
 _geom_angle_atom_site_label_3 
 _geom_angle 
 _geom_angle_site_symmetry_1 
 _geom_angle_site_symmetry_3 
 _geom_angle_publ_flag 
N13 Cd1 N1 173.11(12) 2_655 . ? 
N13 Cd1 O21 87.51(12) 2_655 . ? 
N1 Cd1 O21 93.83(11) . . ? 
N13 Cd1 O23 94.80(12) 2_655 . ? 
N1 Cd1 O23 86.16(11) . . ? 
O21 Cd1 O23 160.79(12) . . ? 
N13 Cd1 O22 90.58(12) 2_655 . ? 
N1 Cd1 O22 96.31(12) . . ? 
O21 Cd1 O22 78.26(12) . . ? 
O23 Cd1 O22 82.65(12) . . ? 
N13 Cd1 O17 86.96(11) 2_655 . ? 
N1 Cd1 O17 86.77(11) . . ? 
O21 Cd1 O17 125.64(11) . . ? 
O23 Cd1 O17 73.56(11) . . ? 
O22 Cd1 O17 155.77(11) . . ? 
C2 N1 C6 118.8(4) . . ? 
C2 N1 Cd1 119.2(3) . . ? 
C6 N1 Cd1 121.8(3) . . ? 
N1 C2 C3 122.8(4) . . ? 
N1 C2 H2 118.6 . . ? 
C3 C2 H2 118.6 . . ? 
C2 C3 C4 118.4(4) . . ? 
C2 C3 N7 123.1(4) . . ? 
C4 C3 N7 118.4(4) . . ? 
C5 C4 C3 118.7(4) . . ? 
C5 C4 H4 120.6 . . ? 
C3 C4 H4 120.6 . . ? 
C4 C5 C6 119.8(4) . . ? 
C4 C5 H5 120.1 . . ? 
C6 C5 H5 120.1 . . ? 
N1 C6 C5 121.4(4) . . ? 
N1 C6 H6 119.3 . . ? 
C5 C6 H6 119.3 . . ? 
C8 N7 C3 125.9(3) . . ? 
C8 N7 H7 117.1 . . ? 
C3 N7 H7 117.1 . . ? 
O9 C8 N10 124.0(4) . . ? 
O9 C8 N7 124.1(4) . . ? 
N10 C8 N7 111.8(3) . . ? 
C8 N10 C11 125.8(3) . . ? 
C8 N10 H10 117.1 . . ? 
C11 N10 H10 117.1 . . ? 
C16 C11 C12 118.4(4) . . ? 
C16 C11 N10 117.9(4) . . ? 
C12 C11 N10 123.7(4) . . ? 
N13 C12 C11 122.5(4) . . ? 
N13 C12 H12 118.7 . . ? 
C11 C12 H12 118.7 . . ? 
C14 N13 C12 118.8(4) . . ? 
C14 N13 Cd1 121.5(3) . 2_645 ? 
C12 N13 Cd1 119.3(3) . 2_645 ? 
N13 C14 C15 121.9(4) . . ? 
N13 C14 H14 119.1 . . ? 
C15 C14 H14 119.1 . . ? 
C14 C15 C16 119.3(4) . . ? 
C14 C15 H15 120.4 . . ? 
C16 C15 H15 120.4 . . ? 
C11 C16 C15 119.2(4) . . ? 
C11 C16 H16 120.4 . . ? 
C15 C16 H16 120.4 . . ? 
N18 O17 Cd1 106.5(2) . . ? 
O17 N18 O20 120.0(3) . . ? 
O17 N18 O19 118.9(3) . . ? 
O20 N18 O19 121.1(3) . . ? 
Cd1 O21 H21A 127(5) . . ? 
Cd1 O21 H21B 110(5) . . ? 
H21A O21 H21B 104(6) . . ? 
Cd1 O22 H22A 119(4) . . ? 
Cd1 O22 H22B 130(4) . . ? 
H22A O22 H22B 106(6) . . ? 
Cd1 O23 H23A 119(4) . . ? 
Cd1 O23 H23B 113(4) . . ? 
H23A O23 H23B 106(5) . . ? 
O24 N25 O27 119.3(3) . . ? 
O24 N25 O26 120.4(3) . . ? 
O27 N25 O26 120.3(3) . . ? 
H28B O28 H28A 126(7) . . ? 
C33 C29 C30 124.8(9) 3_775 . ? 
C31 C30 C29 119.8(10) . . ? 
C30 C31 C32 120.6(7) . . ? 
C32 C32 C33 119.5(6) 3_775 . ? 
C32 C32 C31 119.3(6) 3_775 . ? 
C33 C32 C31 121.2(5) . . ? 
C29 C33 C32 115.7(6) 3_775 . ? 
 
loop_ 
 _geom_hbond_atom_site_label_D 
 _geom_hbond_atom_site_label_H 
 _geom_hbond_atom_site_label_A 
 _geom_hbond_distance_DH 
 _geom_hbond_distance_HA 
 _geom_hbond_distance_DA 
 _geom_hbond_angle_DHA 
 _geom_hbond_site_symmetry_A 
N7 H7 O27  0.88 1.94 2.808(4) 171.0 3_666 
N10 H10 O26  0.88 2.08 2.944(4) 166.2 3_666 
O21 H21A O24  0.82(4) 2.06(5) 2.805(4) 151(6) 1_545 
O21 H21B O28  0.82(4) 1.94(4) 2.751(4) 171(7) 1_645 
O22 H22A O26  0.78(3) 2.43(5) 2.982(4) 128(5) 1_645 
O22 H22A O28  0.78(3) 2.35(4) 3.014(5) 144(5) 1_645 
O22 H22B O20  0.80(4) 2.14(4) 2.943(5) 174(6) 1_655 
O23 H23A O19  0.86(3) 1.91(3) 2.757(4) 170(6) 1_655 
O23 H23B O24  0.77(6) 2.13(6) 2.869(4) 161(5) 2_645 
O23 H23B O27  0.77(6) 2.54(5) 3.039(4) 124(5) 2_645 
O28 H28A O19  0.82(4) 2.21(5) 2.967(4) 154(7) 2 
O28 H28B O9  0.82(3) 1.98(4) 2.778(4) 166(6) 1_465 
 
_diffrn_measured_fraction_theta_max    1.000 
_diffrn_reflns_theta_full              25.50 
_diffrn_measured_fraction_theta_full   1.000 
_refine_diff_density_max    1.487 
_refine_diff_density_min   -1.134 
_refine_diff_density_rms    0.118 
